# Supplementary material
Source: PubMed Central journal article supplement (PMC4461875)

**Fig S3**

**A**

**5PSeq YPD - Codon protection index (p-adj < 0.001) (polyA enrichment)**

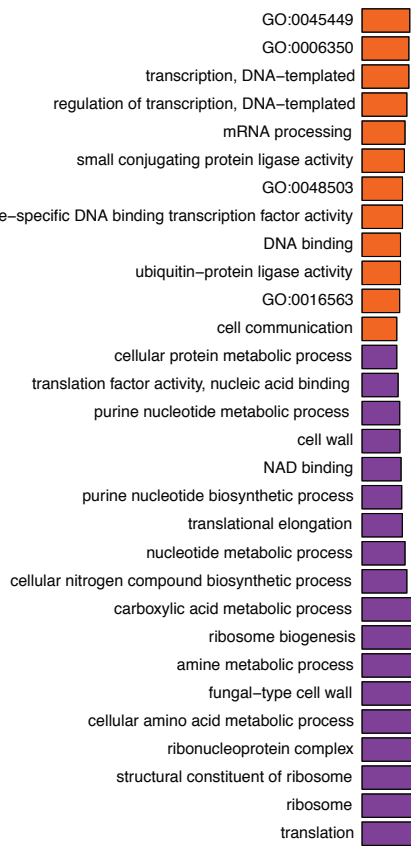

**B**

**5PSeq YPD - Codon protection index (p-adj < 0.001) (rRNA depletion)**

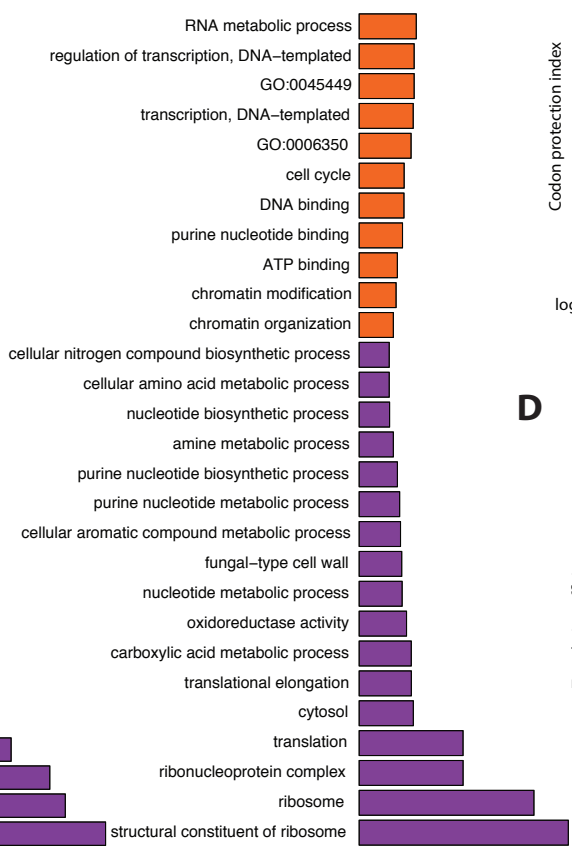

**C**

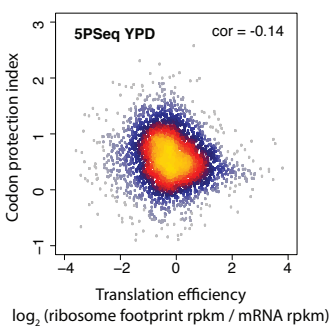

**D**

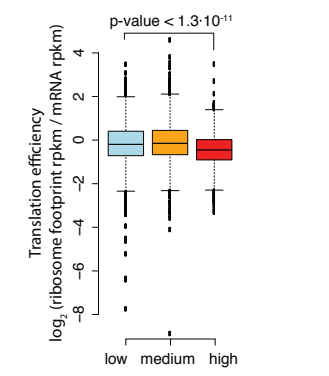

**E**

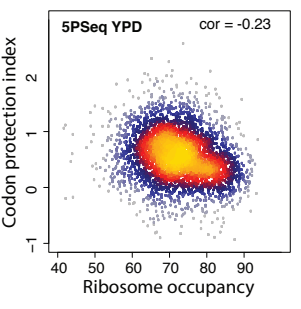

**F**

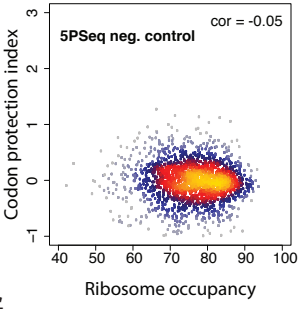

**G**

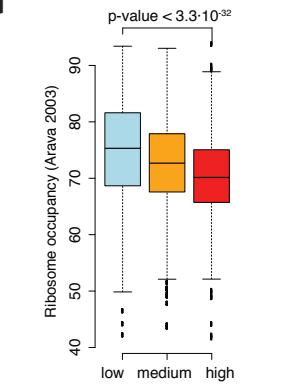

**H**

**Variation in Ribosomal Profiling coverage Biological Process (p-adj < 0.01)**

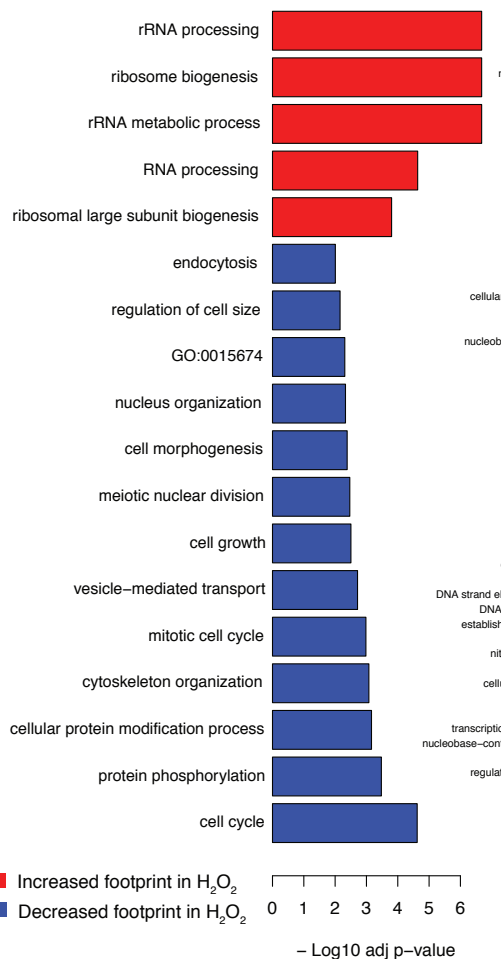

**I**

**Variation in 5PSeq coverage Biological Process (p-adj < 0.01)**

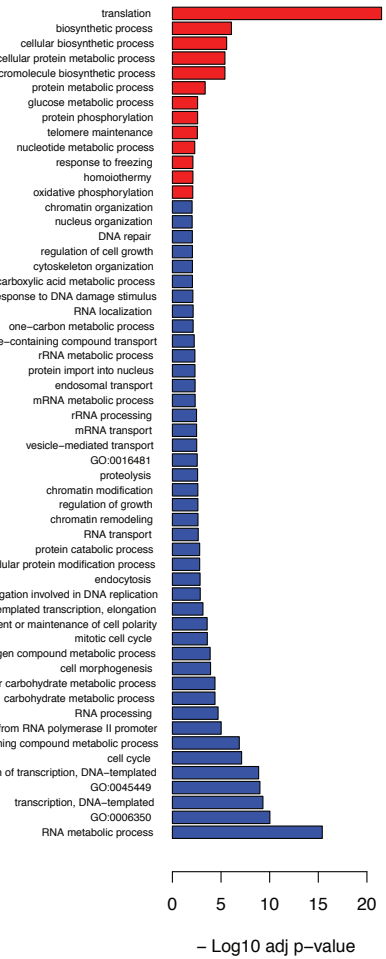

Supplement: NIHMS688997-supplement-3.pdf [file NIHMS688997-supplement-3.pdf]
