# Supplementary material
Source: PubMed Central journal article supplement (PMC4461875)

**Fig S1****A**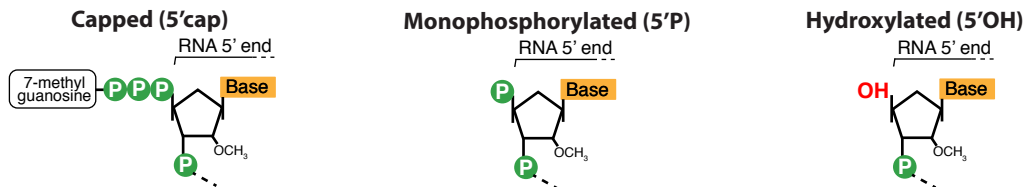**B**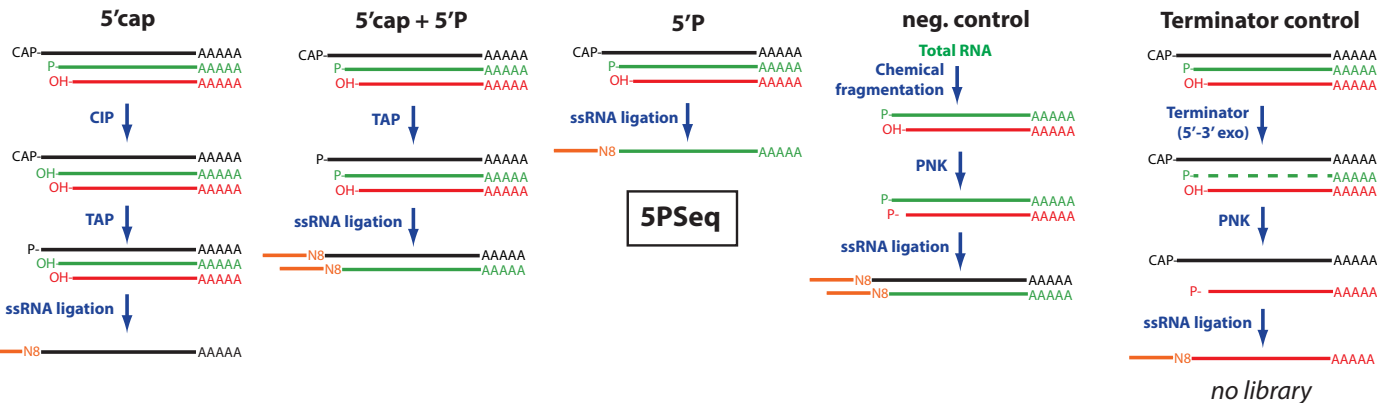**C**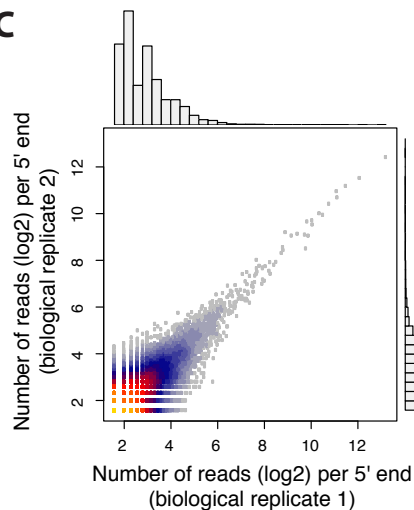**D**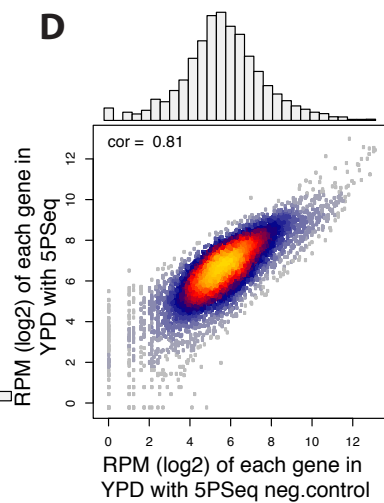**E**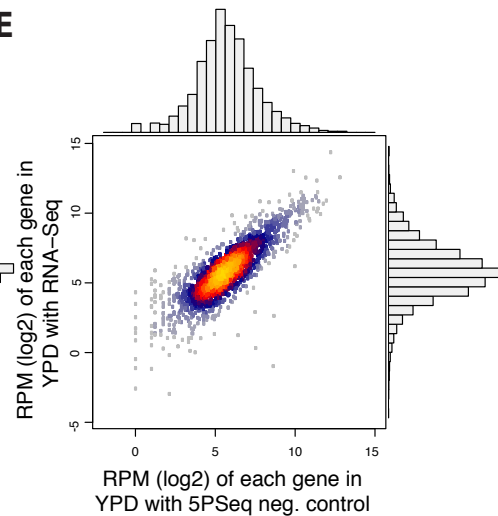

Supplement: NIHMS688997-supplement-1.pdf [file NIHMS688997-supplement-1.pdf]

**Fig S2****A**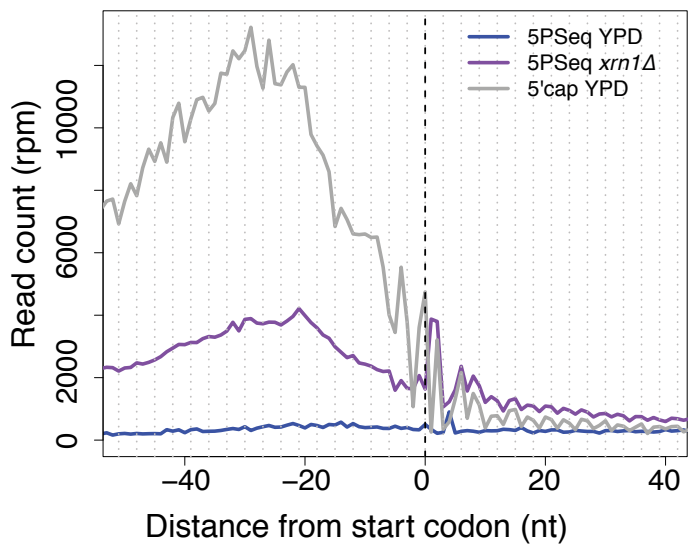**B**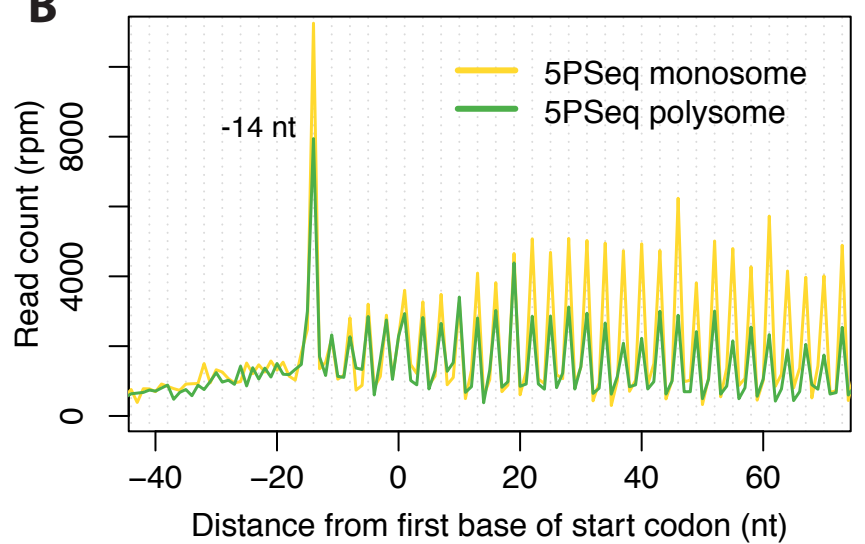**C**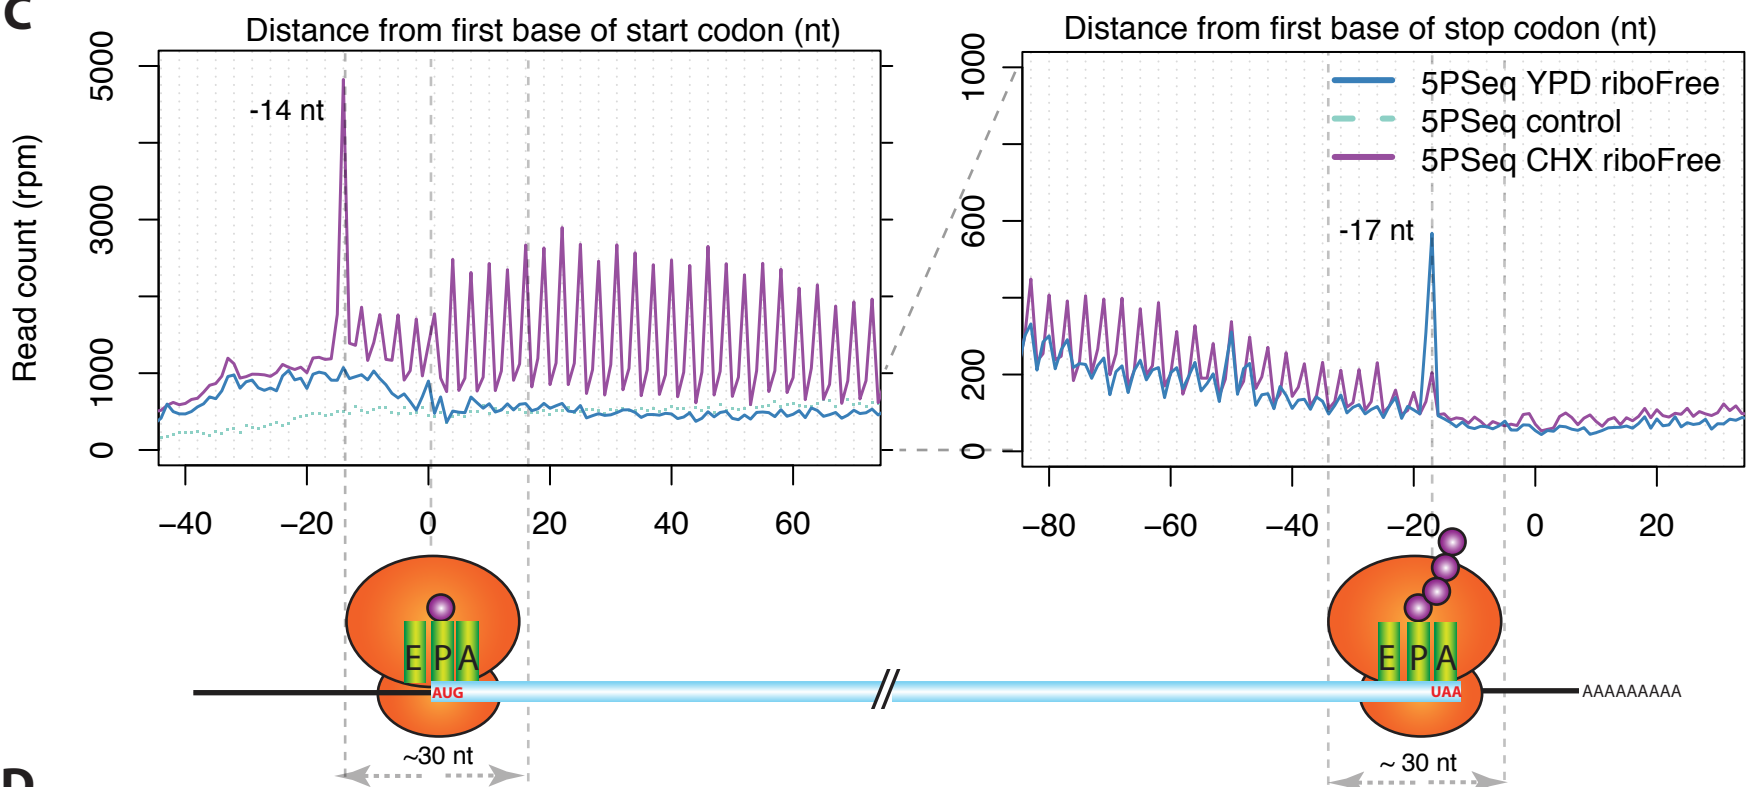**D**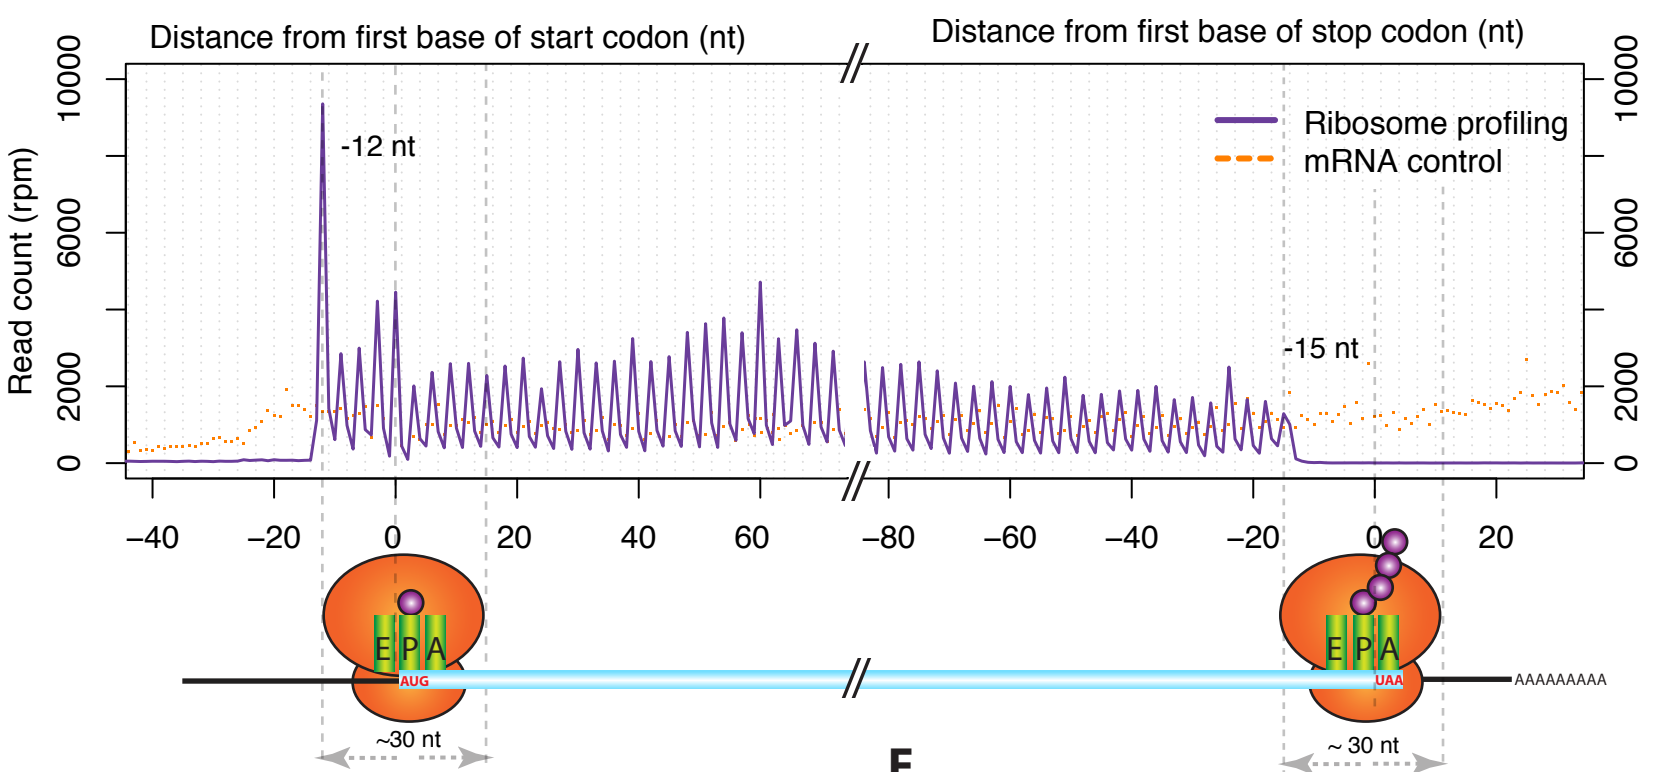**E**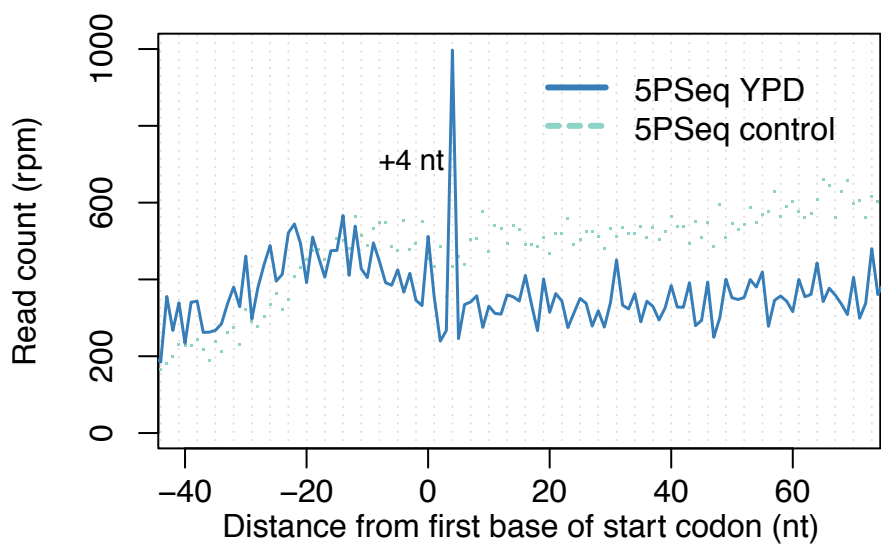**F**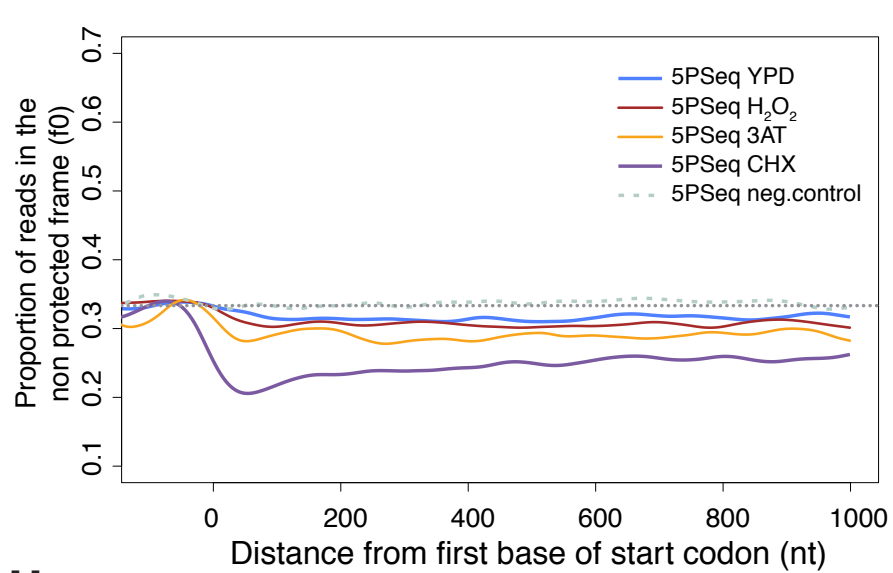**G**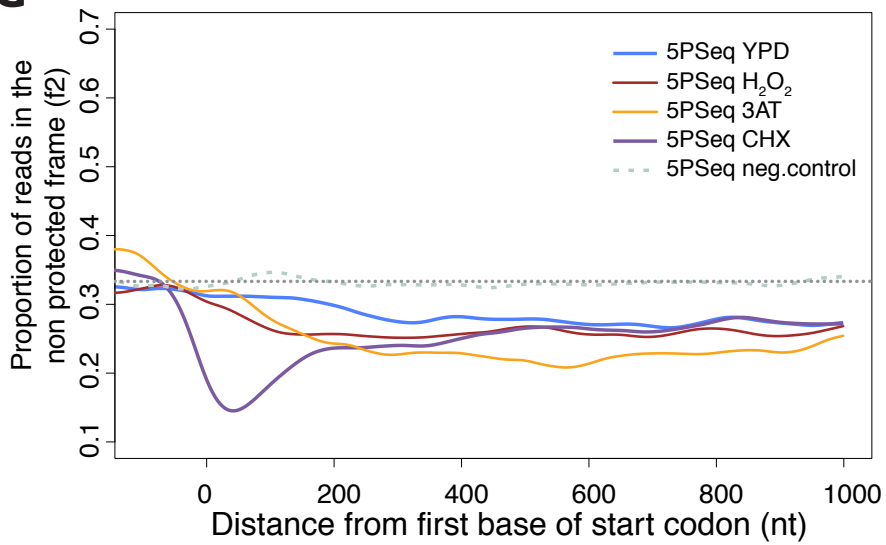**H**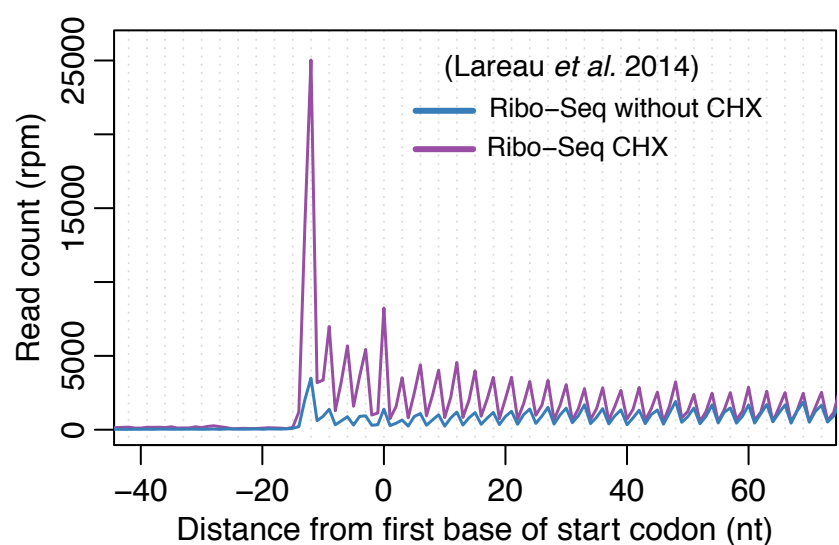**I**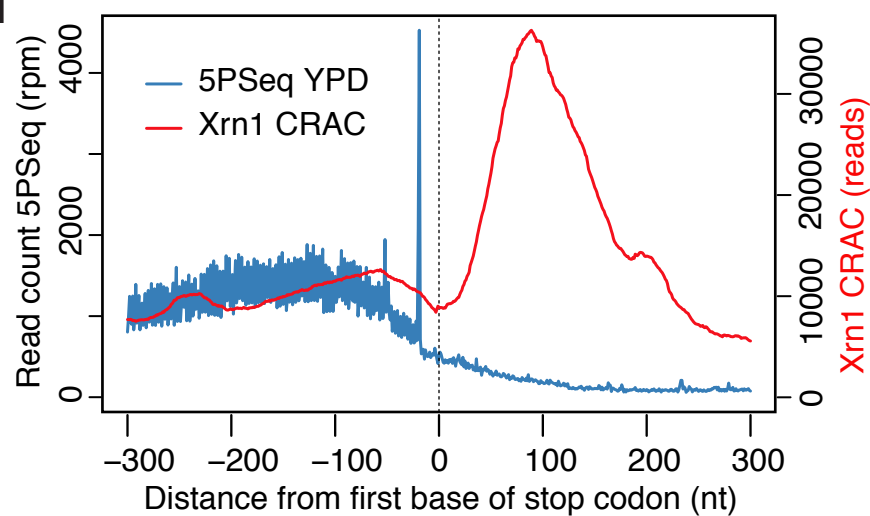**J**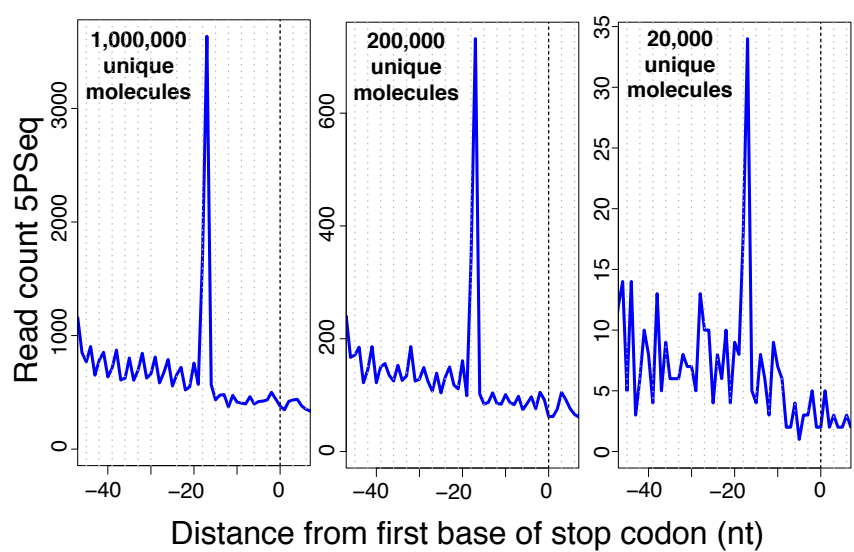

Supplement: NIHMS688997-supplement-2.pdf [file NIHMS688997-supplement-2.pdf]

# Fig S4

## A

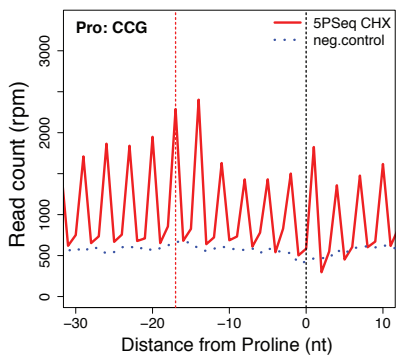

## B

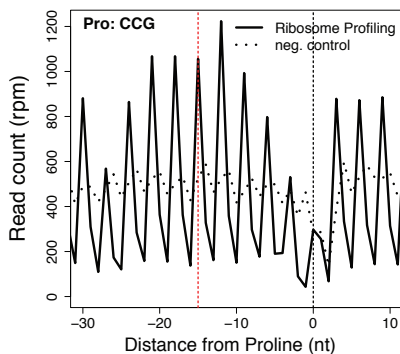

## C

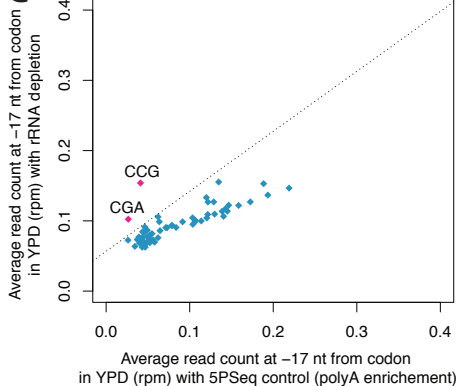

## D

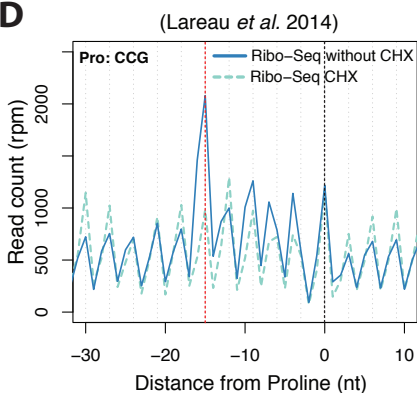

## E

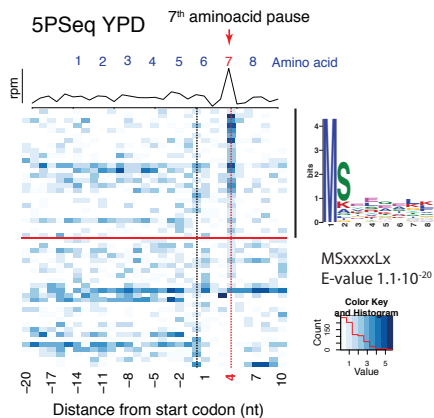

Supplement: NIHMS688997-supplement-4.pdf [file NIHMS688997-supplement-4.pdf]

**Fig S5**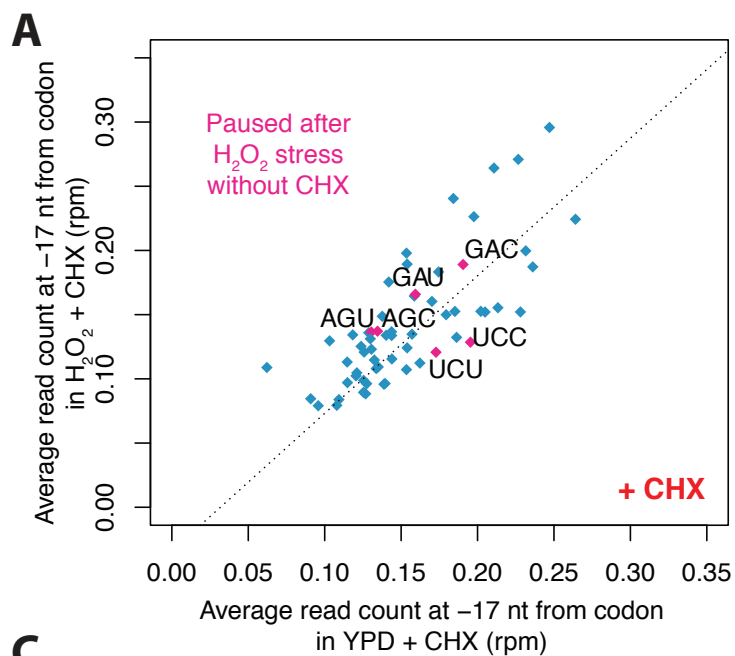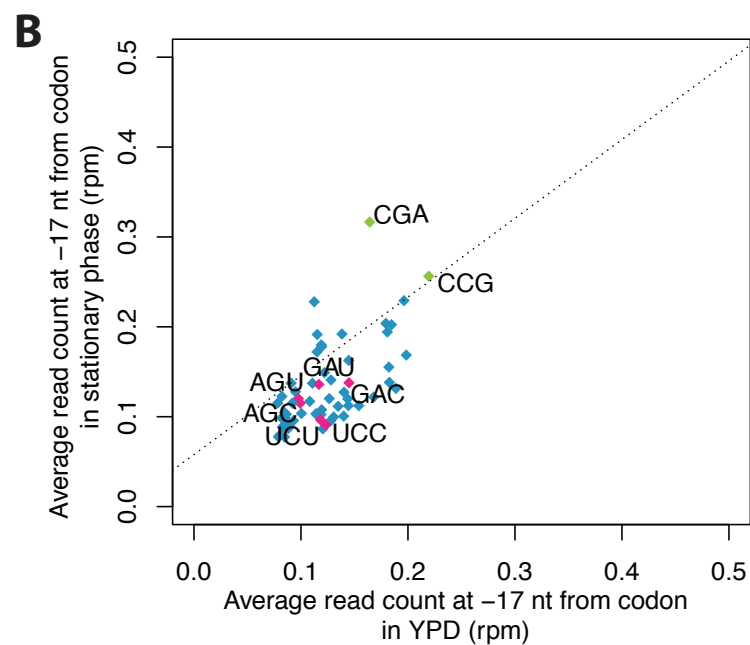**C**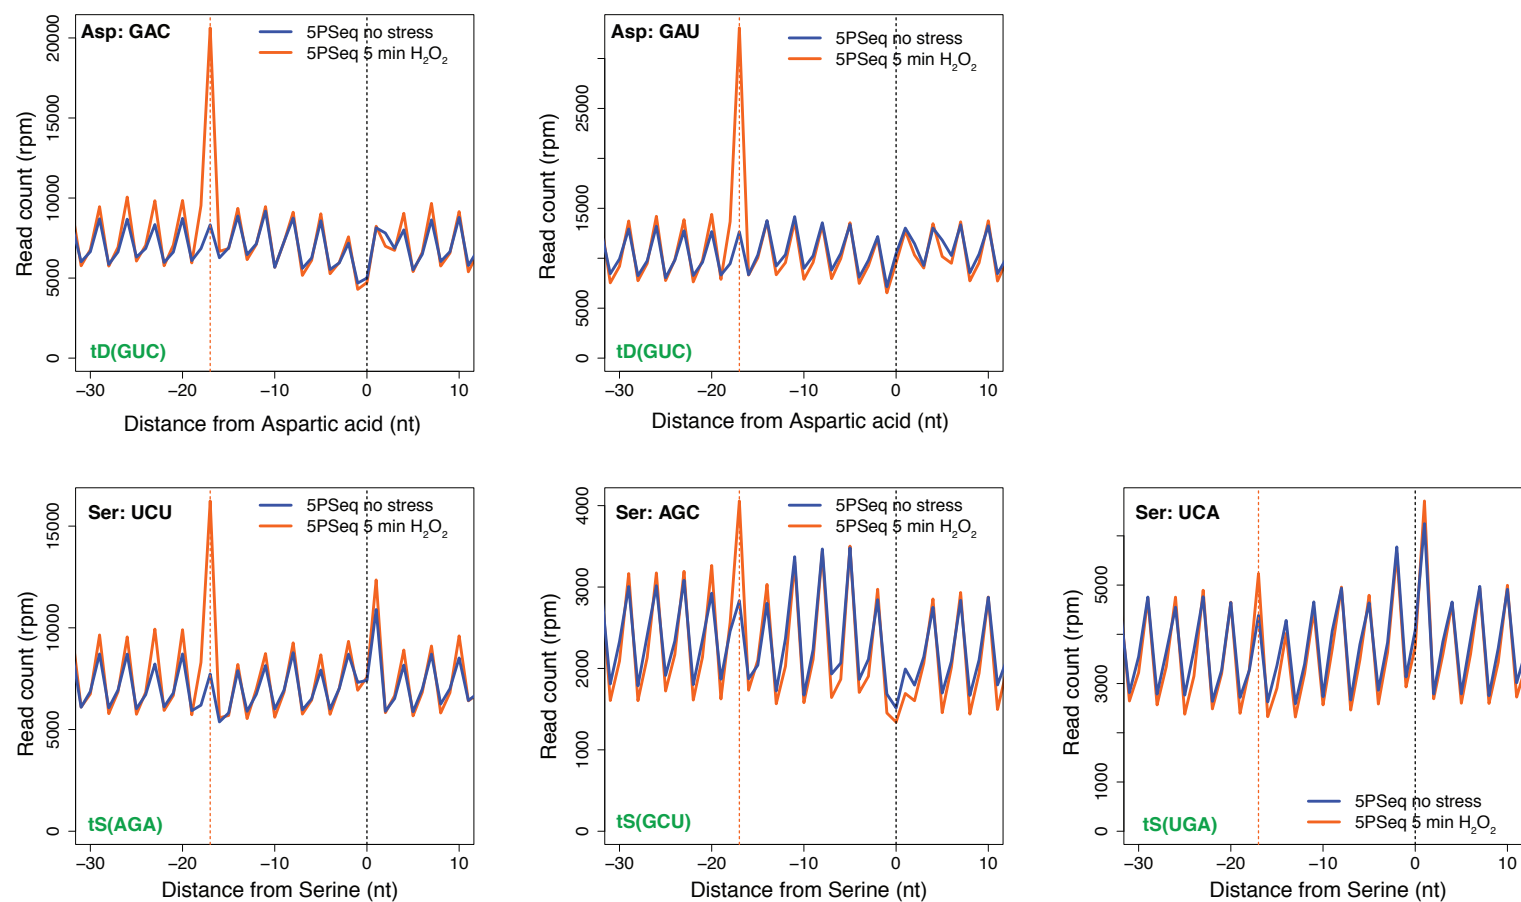

Supplement: NIHMS688997-supplement-5.pdf [file NIHMS688997-supplement-5.pdf]
